# Supplementary material for: Translatome and metabolome effects triggered by gibberellins during rosette growth in Arabidopsis
Source: PubMed Central journal article supplement — J Exp Bot. 2012 Jan 30;63(7):2769–86. doi: 10.1093/jxb/err463 (PMC3346235; doi:10.1093/jxb/err463), 2012-01-30
Supplement: supp_err463_00069625-file002.pdf [file supp_err463_00069625-file002.pdf]

**Translatome and metabolome effects triggered by gibberellins  
during rosette growth in Arabidopsis**

*Dimas M Ribeiro, Wagner L Araújo, Alisdair R Fernie, Jos H M  
Schippers, and Bernd Mueller-Roeber*

**Supplementary Material**

Supplementary Tables S2-S5, Figures S1-S3

Supplementary Table S1 – see separate file

**Table S2** Expression of GA-related genes in plants treated with PAC and/or GA<sub>3</sub>. Values set in bold type were determined by the Student's *t*-test to be significantly different from the control. Data are means ± SE of three independent replicates (each replicate is a pool of five plants).

| AGI ID    | Name           | Relative value     |                   |                    |                   |                   |                    | Total mRNA vs. polysomal mRNA |      |        |
|-----------|----------------|--------------------|-------------------|--------------------|-------------------|-------------------|--------------------|-------------------------------|------|--------|
|           |                | Total mRNA         |                   |                    | Polysomal mRNA    |                   |                    | GA                            | PAC  | PAC+GA |
|           |                | GA                 | PAC               | PAC+GA             | GA                | PAC               | PAC+GA             |                               |      |        |
| At5g25900 | <i>KO</i>      | <b>-1.75±0.15</b>  | <b>1.95±0.21</b>  | <b>-1.88±0.25</b>  | <b>-1.60±0.12</b> | 1.05±0.09         | <b>-1.63±0.18</b>  | 1.09                          | 1.86 | 1.15   |
| At1g05160 | <i>KAO1</i>    | <b>-1.74±0.09</b>  | <b>2.15±0.29</b>  | <b>-2.19±0.35</b>  | -1.16±0.12        | 1.26±0.17         | -1.12±0.15         | 1.30                          | 1.49 | 1.70   |
| At2g32440 | <i>KAO2</i>    | -1.43±0.11         | 1.54±0.24         | -1.62±0.26         | -1.50±0.12        | 1.45±0.06         | -1.33±0.10         | 0.95                          | 1.06 | 1.22   |
| At4g25420 | <i>GA20ox1</i> | <b>-6.78±0.36</b>  | <b>6.75±0.84</b>  | <b>-9.29±0.51</b>  | <b>-4.58±0.68</b> | <b>3.08±0.36</b>  | <b>-7.16±1.07</b>  | 1.48                          | 2.19 | 1.30   |
| At5g51810 | <i>GA20ox2</i> | <b>-10.88±1.03</b> | <b>27.20±1.04</b> | <b>-3.34±1.05</b>  | <b>-5.81±1.14</b> | <b>17.15±1.74</b> | <b>-2.46±0.26</b>  | 1.87                          | 1.59 | 1.36   |
| At5g07200 | <i>GA20ox3</i> | <b>-9.36±1.19</b>  | <b>37.08±1.21</b> | <b>-28.77±2.11</b> | <b>-8.47±1.04</b> | <b>24.36±3.88</b> | <b>-21.41±2.17</b> | 1.10                          | 1.52 | 1.34   |
| At1g15550 | <i>GA3ox1</i>  | <b>-4.95±1.11</b>  | <b>8.84±1.18</b>  | <b>-15.31±1.11</b> | <b>-4.18±1.69</b> | <b>4.66±1.03</b>  | <b>-4.35±1.12</b>  | 1.18                          | 1.90 | 3.52   |
| At1g80340 | <i>GA3ox2</i>  | <b>-4.59±0.96</b>  | <b>4.75±0.28</b>  | <b>-3.80±0.73</b>  | -1.43±0.09        | 1.34±0.14         | -1.59±0.10         | 3.21                          | 3.54 | 2.39   |
| At1g78440 | <i>GA2ox1</i>  | 1.44±0.14          | <b>-5.99±1.02</b> | 1.36±0.15          | 1.23±0.12         | <b>-3.25±0.47</b> | 1.16±0.09          | 1.17                          | 1.84 | 1.17   |
| At1g30040 | <i>GA2ox2</i>  | <b>1.99±0.15</b>   | <b>-3.17±0.52</b> | <b>2.57±0.44</b>   | <b>2.71±0.51</b>  | <b>-2.98±0.29</b> | <b>2.49±0.35</b>   | 0.73                          | 1.06 | 1.03   |
| At2g34555 | <i>GA2ox3</i>  | <b>2.92±0.47</b>   | <b>-2.12±0.15</b> | <b>3.33±0.39</b>   | <b>1.96±0.06</b>  | -1.17±0.03        | <b>1.98±0.22</b>   | 1.49                          | 1.81 | 1.68   |
| At1g47990 | <i>GA2ox4</i>  | 1.18±0.03          | <b>-2.80±0.24</b> | 1.29±0.05          | <b>1.92±0.08</b>  | <b>-1.62±0.11</b> | 1.27±0.04          | 0.61                          | 1.73 | 1.01   |
| At1g50960 | <i>GA2ox7</i>  | <b>1.70±0.10</b>   | <b>-1.82±0.16</b> | <b>1.81±0.12</b>   | 1.08±0.02         | -1.57±0.15        | 1.50±0.11          | 1.57                          | 1.16 | 1.21   |
| At1g21200 | <i>GA2ox8</i>  | <b>2.91±0.46</b>   | <b>-5.61±0.26</b> | <b>3.74±0.62</b>   | 1.80±0.09         | -1.40±0.13        | 1.34±0.06          | 1.62                          | 4.01 | 2.79   |
| At3g63010 | <i>GID1B</i>   | <b>-3.02±0.61</b>  | <b>3.37±1.16</b>  | <b>-2.32±1.12</b>  | <b>-2.65±0.82</b> | <b>2.01±0.16</b>  | <b>-2.11±0.53</b>  | 1.14                          | 1.67 | 1.09   |
| At1g66350 | <i>RGL1</i>    | 1.19±0.53          | -1.95±0.54        | 1.07±0.31          | <b>1.65±0.13</b>  | <b>-1.63±0.33</b> | <b>1.65±0.05</b>   | 0.72                          | 1.19 | 0.65   |
| At3g03450 | <i>RGL2</i>    | <b>1.54±0.17</b>   | <b>-2.72±0.15</b> | <b>1.64±0.13</b>   | 1.26±0.06         | <b>-1.81±0.09</b> | 1.37±0.24          | 1.22                          | 1.50 | 1.19   |
| At5g17490 | <i>RGL3</i>    | 1.27±0.55          | <b>-2.25±0.53</b> | 1.05±0.89          | <b>1.57±0.13</b>  | <b>-1.48±0.20</b> | 1.25±0.12          | 0.81                          | 1.52 | 0.84   |

**Table S3** Relative metabolite content of rosettes of plants treated with PAC and/or GA<sub>3</sub>. Values are means ± SE of six replicates (each replicate is a pool of five plants). Values set in bold type were determined by the Student's *t*-test to be significantly different from the control (*P* < 0.05).

| Metabolite                          | Control   | GA <sub>3</sub>  | PAC              | PAC+GA <sub>3</sub> |
|-------------------------------------|-----------|------------------|------------------|---------------------|
| <b>Amino acids</b>                  |           |                  |                  |                     |
| Alanine                             | 1.00±0.10 | <b>1.69±0.14</b> | <b>6.69±0.95</b> | <b>3.42±0.11</b>    |
| Arginine                            | 1.00±0.07 | 1.09±0.15        | <b>1.44±0.11</b> | 1.04±0.14           |
| Asparagine                          | 1.00±0.10 | <b>0.53±0.11</b> | 0.89±0.10        | <b>0.36±0.04</b>    |
| Aspartate                           | 1.00±0.08 | 0.98±0.09        | <b>1.54±0.16</b> | 1.01±0.10           |
| Cysteine                            | 1.00±0.06 | 1.06±0.15        | <b>2.37±0.25</b> | 1.18±0.03           |
| GABA                                | 1.00±0.05 | 1.11±0.04        | 1.04±0.03        | 1.02±0.04           |
| Glutamate                           | 1.00±0.02 | <b>0.70±0.08</b> | 0.93±0.04        | <b>0.59±0.05</b>    |
| Glutamine                           | 1.00±0.10 | 0.73±0.15        | 1.04±0.04        | <b>0.58±0.07</b>    |
| Glycine                             | 1.00±0.07 | 1.23±0.36        | <b>0.45±0.03</b> | <b>1.68±0.17</b>    |
| Histidine                           | 1.00±0.13 | 1.27±0.15        | 0.70±0.09        | 1.00±0.07           |
| Homoserine                          | 1.00±0.12 | 1.13±0.24        | 0.98±0.08        | <b>1.51±0.17</b>    |
| Isoleucine                          | 1.00±0.11 | 0.90±0.13        | <b>1.20±0.05</b> | 0.80±0.04           |
| Leucine                             | 1.00±0.06 | 1.04±0.04        | <b>1.29±0.04</b> | 1.02±0.02           |
| Lysine                              | 1.00±0.13 | 1.11±0.15        | 1.04±0.06        | 0.93±0.06           |
| Methionine                          | 1.00±0.04 | 1.03±0.12        | <b>1.26±0.06</b> | 1.02±0.06           |
| Ornithine                           | 1.00±0.11 | 1.21±0.54        | 1.02±0.20        | 1.17±0.19           |
| Phenylalanine                       | 1.00±0.06 | 1.11±0.03        | 1.14±0.11        | 1.03±0.05           |
| Proline                             | 1.00±0.07 | 1.21±0.31        | 1.09±0.04        | <b>0.53±0.05</b>    |
| Serine                              | 1.00±0.03 | 1.02±0.08        | 0.95±0.03        | 1.04±0.04           |
| Threonine                           | 1.00±0.04 | 0.90±0.12        | <b>1.28±0.08</b> | 0.87±0.05           |
| Tryptophan                          | 1.00±0.25 | <b>1.78±0.28</b> | <b>0.62±0.11</b> | <b>1.64±0.12</b>    |
| Tyrosine                            | 1.00±0.17 | 1.18±0.22        | 0.96±0.04        | 0.92±0.08           |
| Valine                              | 1.00±0.06 | 1.04±0.04        | 1.10±0.09        | 1.12±0.03           |
| <b>Organic acids</b>                |           |                  |                  |                     |
| Ascorbate                           | 1.00±0.12 | 1.03±0.13        | 0.95±0.02        | 0.82±0.03           |
| Aconitate                           | 1.00±0.13 | 1.04±0.18        | 0.71±0.09        | 0.70±0.08           |
| Citrate                             | 1.00±0.22 | <b>1.9±0.24</b>  | 1.32±0.11        | 1.22±0.19           |
| Fumarate                            | 1.00±0.14 | 0.95±0.11        | <b>2.04±0.20</b> | 0.92±0.12           |
| Isocitrate                          | 1.00±0.11 | 0.72±0.17        | 1.03±0.11        | <b>0.55±0.06</b>    |
| α-Ketoglutarate                     | 1.00±0.20 | 0.72±0.12        | 0.66±0.09        | 0.79±0.12           |
| Lactate                             | 1.00±0.26 | <b>0.38±0.03</b> | <b>0.27±0.02</b> | 0.69±0.08           |
| Malate                              | 1.00±0.16 | 0.85±0.09        | <b>1.75±0.12</b> | 0.80±0.09           |
| Pyruvate                            | 1.00±0.10 | <b>0.80±0.03</b> | 0.89±0.07        | 1.05±0.05           |
| Quinic acid                         | 1.00±0.05 | 0.84±0.07        | <b>1.44±0.11</b> | 0.89±0.08           |
| Succinate                           | 1.00±0.12 | 1.08±0.07        | 1.13±0.10        | 1.02±0.07           |
| <b>Sugars and sugar derivatives</b> |           |                  |                  |                     |
| Erythritol                          | 1.00±0.02 | <b>1.50±0.03</b> | <b>0.84±0.06</b> | <b>1.42±0.05</b>    |
| Fructose                            | 1.00±0.15 | 1.02±0.19        | 0.98±0.09        | 0.89±0.03           |
| Fructose-6-P                        | 1.00±0.05 | 1.03±0.05        | 1.01±0.11        | 1.12±0.11           |
| Glucose                             | 1.00±0.08 | 1.18±0.08        | 0.97±0.05        | 1.03±0.02           |
| Glucose-6-P                         | 1.00±0.09 | 1.12±0.06        | 1.05±0.08        | 0.98±0.05           |
| 3-P-Glycerate                       | 1.00±0.12 | <b>2.49±0.56</b> | 0.82±0.19        | <b>2.14±0.39</b>    |
| Mannose                             | 1.00±0.12 | 1.03±0.15        | 0.93±0.04        | 0.79±0.05           |
| Rhamnose                            | 1.00±0.06 | 1.04±0.03        | <b>1.30±0.06</b> | 0.97±0.03           |
| Sucrose                             | 1.00±0.07 | 0.98±0.05        | 1.15±0.06        | 0.95±0.04           |
| Myo-Inositol                        | 1.00±0.07 | 1.01±0.08        | 0.95±0.01        | 0.89±0.03           |
| Trehalose                           | 1.00±0.05 | 1.20±0.08        | 0.91±0.04        | 1.04±0.04           |

**Table S4** Paclobutrazol increases protein and chlorophyll concentration in fully expanded leaves. Twenty days after sowing, when the first pair of true leaves was completely expanded, plants grown singly in pots were watered with 10 mL PAC (0.17 mM). For GA treatment, each plant was sprayed every second day with 1 mL of 50  $\mu$ M GA<sub>3</sub>. Leaf discs (12.5 mm<sup>2</sup>) were harvested from the first pair of true leaves five days after treatment. Area of the first pair of true leaves at 20 days after sowing (start of treatments) was  $92.7 \pm 7.5$  mm<sup>2</sup>; protein and chlorophyll concentrations were  $14.0 \pm 1.1$  (79.2  $\pm$  5.9) and  $1.6 \pm 0.07$  (8.9  $\pm$  0.8) mg g<sup>-1</sup> FW [ $\mu$ g leaf disc<sup>-1</sup>]. Comparisons were made in each column by Tukey test at the 5 % level. Mean  $\pm$  SE of six replicates. Each replicate consisted of 10 leaf discs.

| Treatment           | Area               | Protein                 |                                     | Total chlorophyll       |                                     |
|---------------------|--------------------|-------------------------|-------------------------------------|-------------------------|-------------------------------------|
|                     | [mm <sup>2</sup> ] | [mg g <sup>-1</sup> FW] | [ $\mu$ g leaf disc <sup>-1</sup> ] | [mg g <sup>-1</sup> FW] | [ $\mu$ g leaf disc <sup>-1</sup> ] |
| Control             | 92.1 $\pm$ 8.3 a   | 14.3 $\pm$ 1.0 b        | 81.5 $\pm$ 7.2 b                    | 1.5 $\pm$ 0.03 b        | 8.6 $\pm$ 0.2 b                     |
| GA <sub>3</sub>     | 93.6 $\pm$ 8.1 a   | 13.8 $\pm$ 1.2 b        | 78.7 $\pm$ 8.1 b                    | 1.4 $\pm$ 0.05 b        | 8.2 $\pm$ 0.3 b                     |
| PAC                 | 91.8 $\pm$ 9.8 a   | 20.0 $\pm$ 0.8 a        | 110.0 $\pm$ 7.4 a                   | 2.2 $\pm$ 0.07 a        | 12.0 $\pm$ 0.5 a                    |
| PAC+GA <sub>3</sub> | 92.4 $\pm$ 5.3 a   | 14.5 $\pm$ 0.9 b        | 82.6 $\pm$ 6.6 b                    | 1.6 $\pm$ 0.04 b        | 8.3 $\pm$ 0.3 b                     |

**Table S5.** Sequence of primers used for qRT-PCR.

| AGI ID    | Name          | Primer sequences          |                           |
|-----------|---------------|---------------------------|---------------------------|
|           |               | Forward                   | Reverse                   |
| At5g25900 | <i>KO</i>     | TCGGTGTAGCATTGAAGC        | TCGACAAAGTCACACCGA        |
| At1g05160 | <i>KAO1</i>   | TGAGGTTCTACAAAGAGCAAAGGC  | ACTCGAAGTGTCTCATCGACAACC  |
| At2g32440 | <i>KAO2</i>   | AAGAGTGATGTCCAAATGGATGGC  | GGTCCAAATGGACGTTCCCTAAACC |
| At4g25420 | <i>GA2ox1</i> | AGATTACTTCTGCGATGCGTTGG   | TCTTGATACACCTTCCCAAATGGC  |
| At5g51810 | <i>GA2ox2</i> | CAAGAGTTCGAGCAGTTTGGGAAG  | TCGGAAATAGTCTCGGTTTACGC   |
| At5g07200 | <i>GA2ox3</i> | ACATAGGCGACACCTTCATGGC    | TCCTTTCTCTCTCGCTGTTACC    |
| At1g60980 | <i>GA2ox4</i> | GAACATTGGCGACACTTTAATGGC  | TGGTGGCTTCACCACTTTGTCC    |
| At1g44090 | <i>GA2ox5</i> | AACGTTGGAGACACCTTCATGGC   | ACTGCCCTGTGGTAACAACCTCC   |
| At1g15550 | <i>GA3ox1</i> | CCCAACATCACCTCAACTACTGC   | GGCCCATTC AATGTCTTCTTCGC  |
| At1g80340 | <i>GA3ox2</i> | CCAGCCACCACCTCAAATACTGTG  | ATTAGGCCCGGCCCATTTGTATG   |
| At4g21690 | <i>GA3ox3</i> | TCATGCCGAGTTCTGCAATGTG    | CCTAACGAGCCCATCAACATGC    |
| At1g80330 | <i>GA3ox4</i> | CCTCATGATCACACCAAGTACTGC  | TCTTCCACGGTGACACCAAGTG    |
| At1g78440 | <i>GA2ox1</i> | AACGTTGGTGACTCTCTCCAGGTG  | AACCCTATGCCTCACGCTCTTG    |
| At1g30040 | <i>GA2ox2</i> | AGATGGAAGTTGGGTCGCTGTC    | CCCGTTAGTCATAACCTGAAGAGC  |
| At2g34555 | <i>GA2ox3</i> | TCCACCTGACCCGTTTGGTTAC    | TACTCAAGCCAGCCAAGGTCAC    |
| At1g47990 | <i>GA2ox4</i> | TTTCGCTCTCAGCTCTCCTTCAGC  | TCACGAGCCAACTGCTTAACTGC   |
| At1g50960 | <i>GA2ox7</i> | TGATGATCGCAACAACCTCAGAAC  | CGAACTCACGTTCACTTGTTTCCC  |
| At1g21200 | <i>GA2ox8</i> | TGGTGACTTATTTTCAGGCATGGAG | CCTTTGGGTTTCGTCATCACACG   |
| At3g63010 | <i>GID1B</i>  | TGGAGACTATGGCTGGTGGTAAC   | AGTGGGACAATTCTCTTGCATTCCG |
| At1g66350 | <i>RGL1</i>   | TTGTTGCTTGGATGGCAAACGC    | ACGATTGATTCGCCACGCAGATG   |
| At3g03450 | <i>RGL2</i>   | TTCGAAACCCGACCCGAATCTG    | AACCGGTGGAGCTCAAATACCG    |
| At5g17490 | <i>RGL3</i>   | AGCTGTTAGCGACGGTTAAGGC    | ACGTCACCGTTATGGTTCGCTTC   |

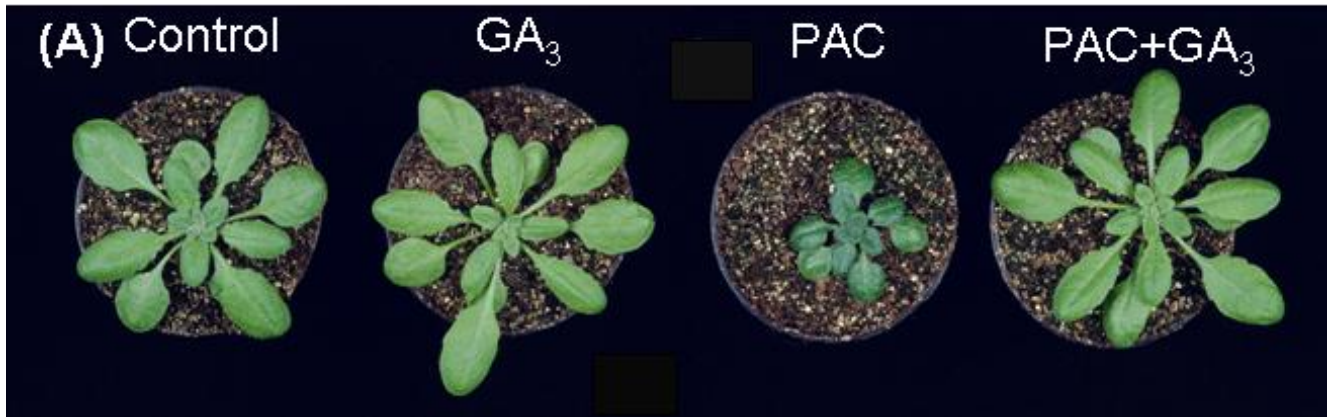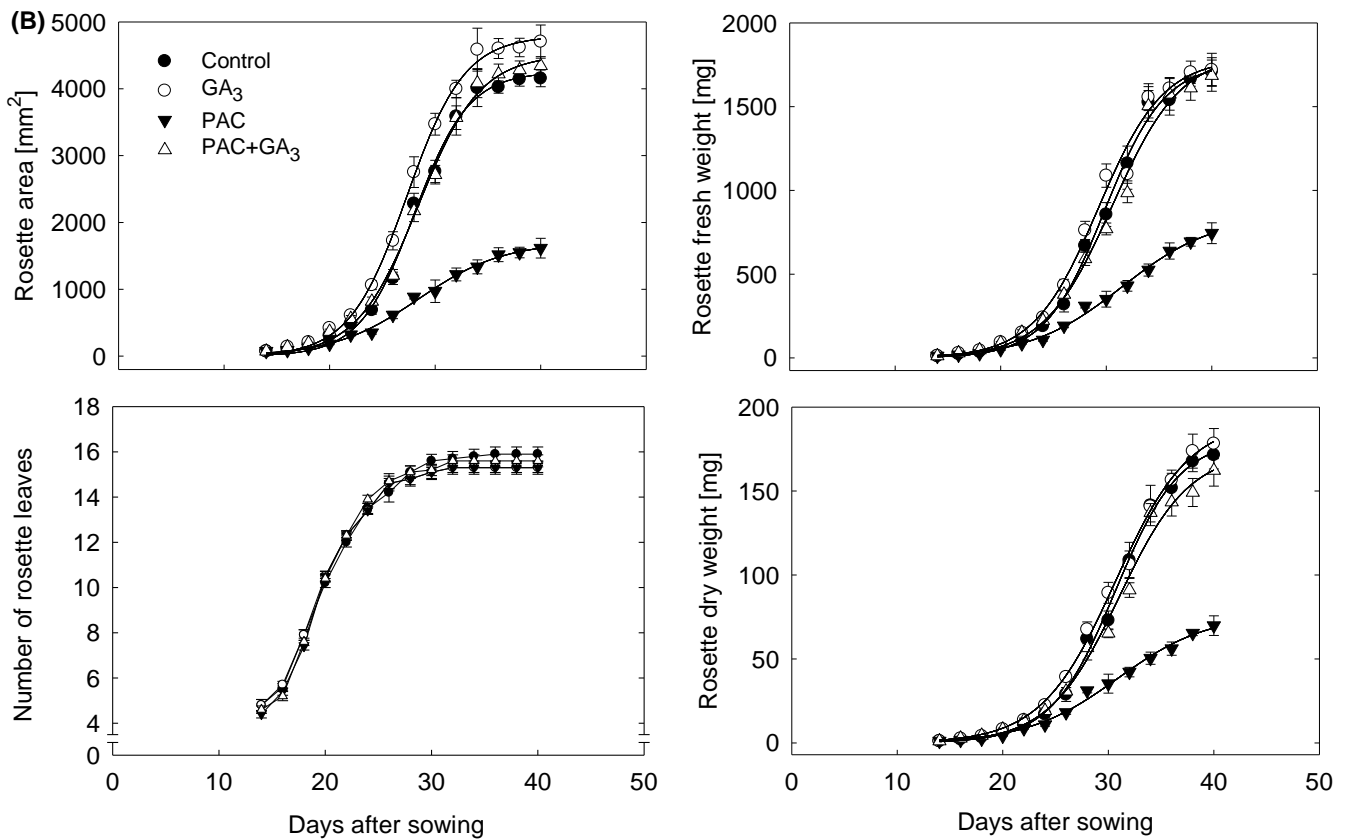

**Figure S1** Phenotypic changes of *Arabidopsis* wild-type plants caused by PAC and/or GA<sub>3</sub> treatment. (A) Shoots of 27-day-old plants. (B) Time course of rosette growth of plants treated with PAC and/or GA<sub>3</sub>. Rosette growth was described by the sigmoidal function  $y = A / (1 + \exp \{ - [(x - x_0) / b] \})$ . Values are presented as means  $\pm$  SE of ten individual determinations.

**Figure S2: MapMan representations of differentially expressed genes.**

(A) PAC versus control - Metabolism overview.

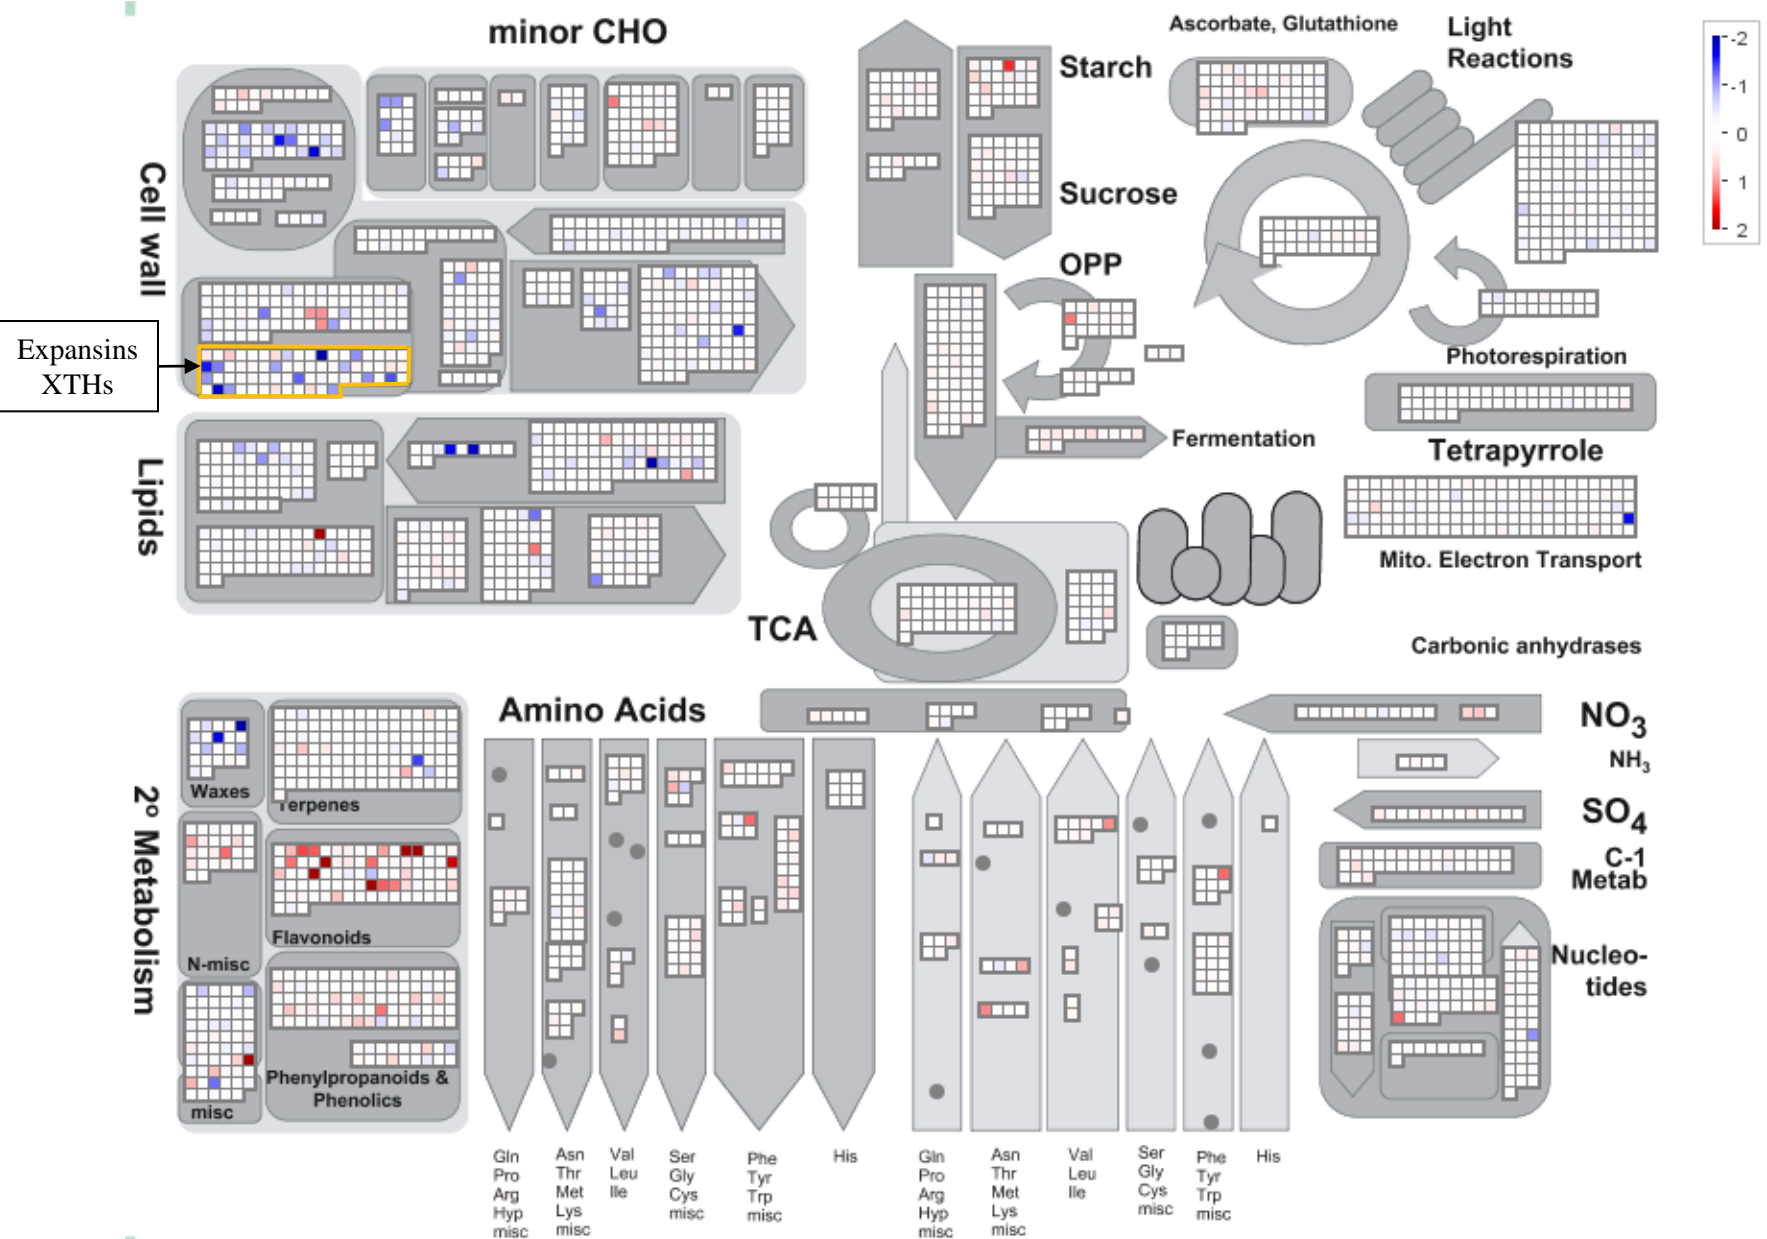

**Figure S2: MapMan representations of differentially expressed genes.**

(B) GA versus control - Metabolism overview.

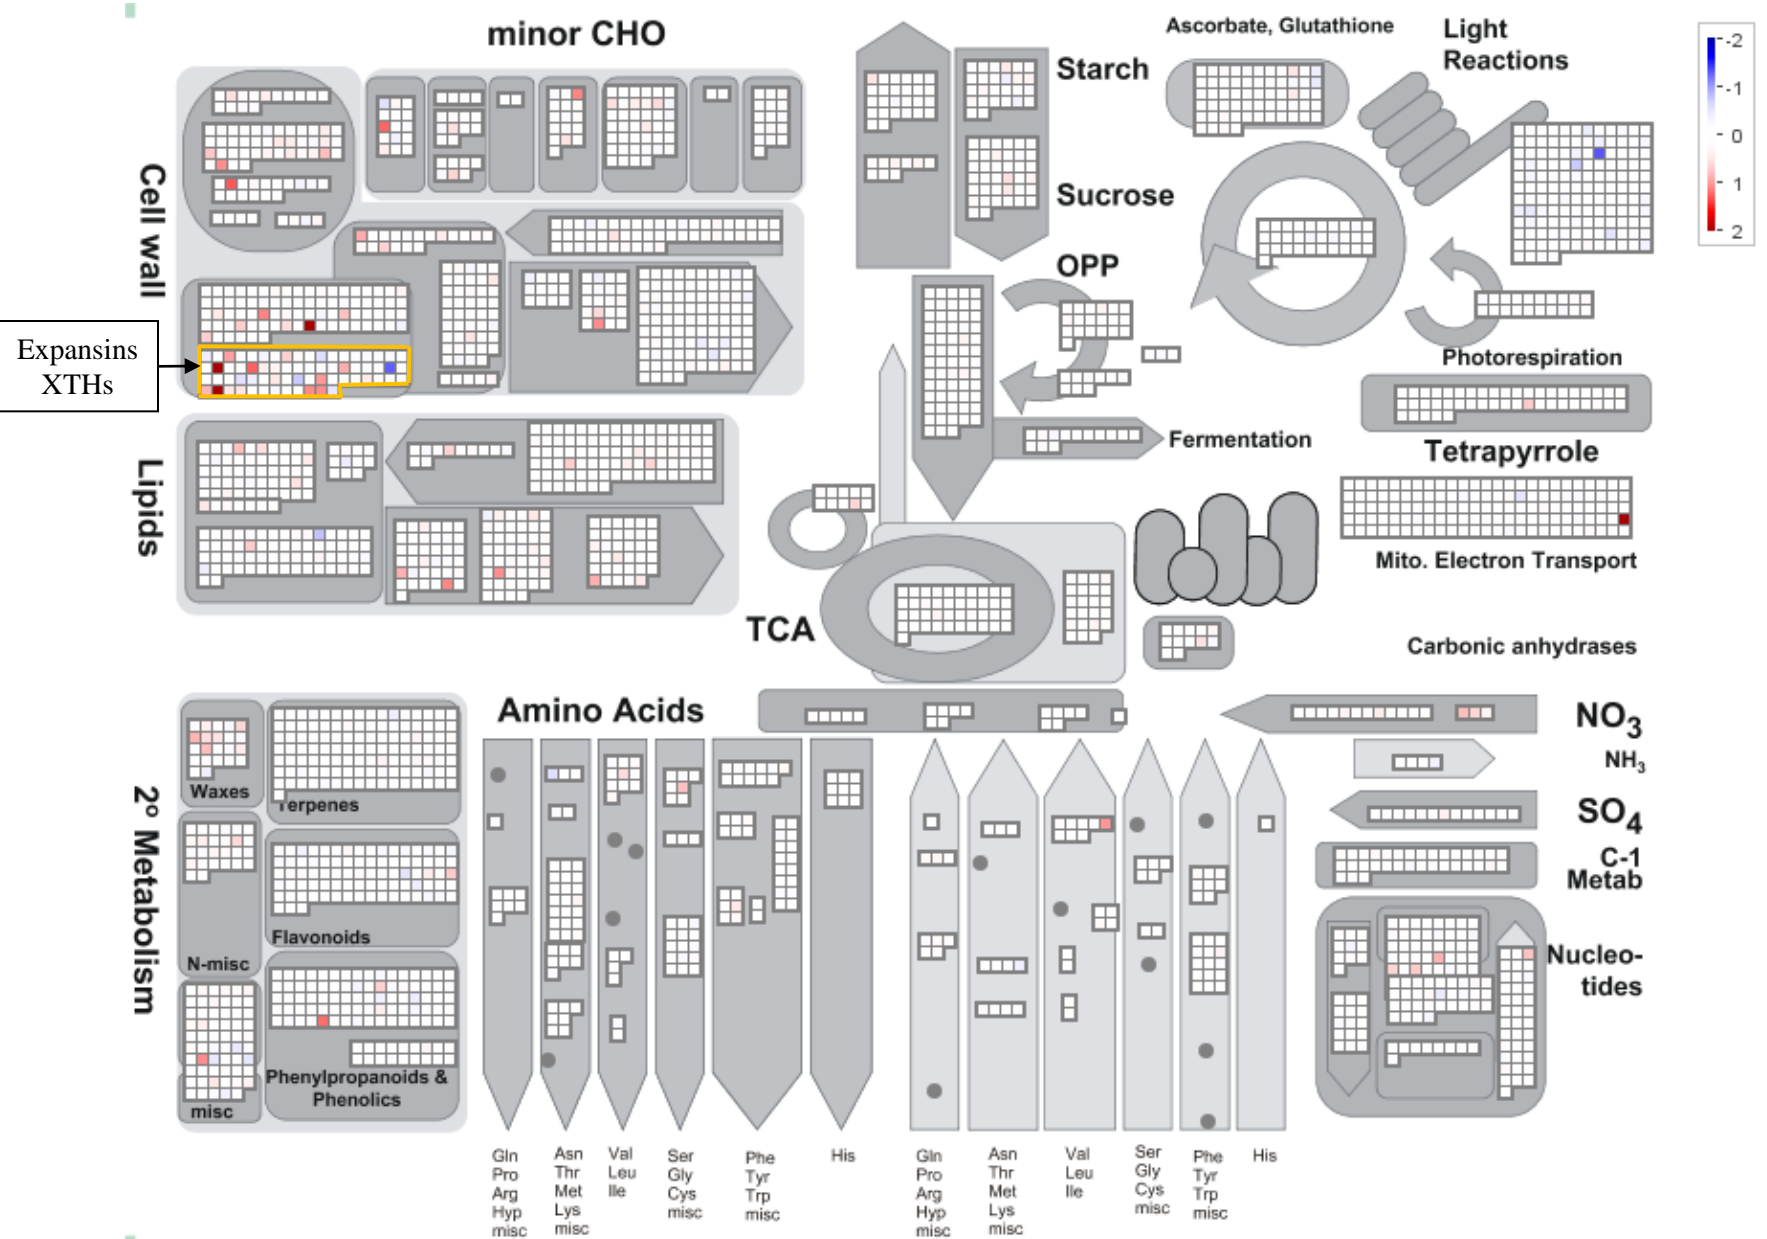



**Figure S2: MapMan representations of differentially expressed genes.**  
 (C) PAC versus control - Secondary metabolism.

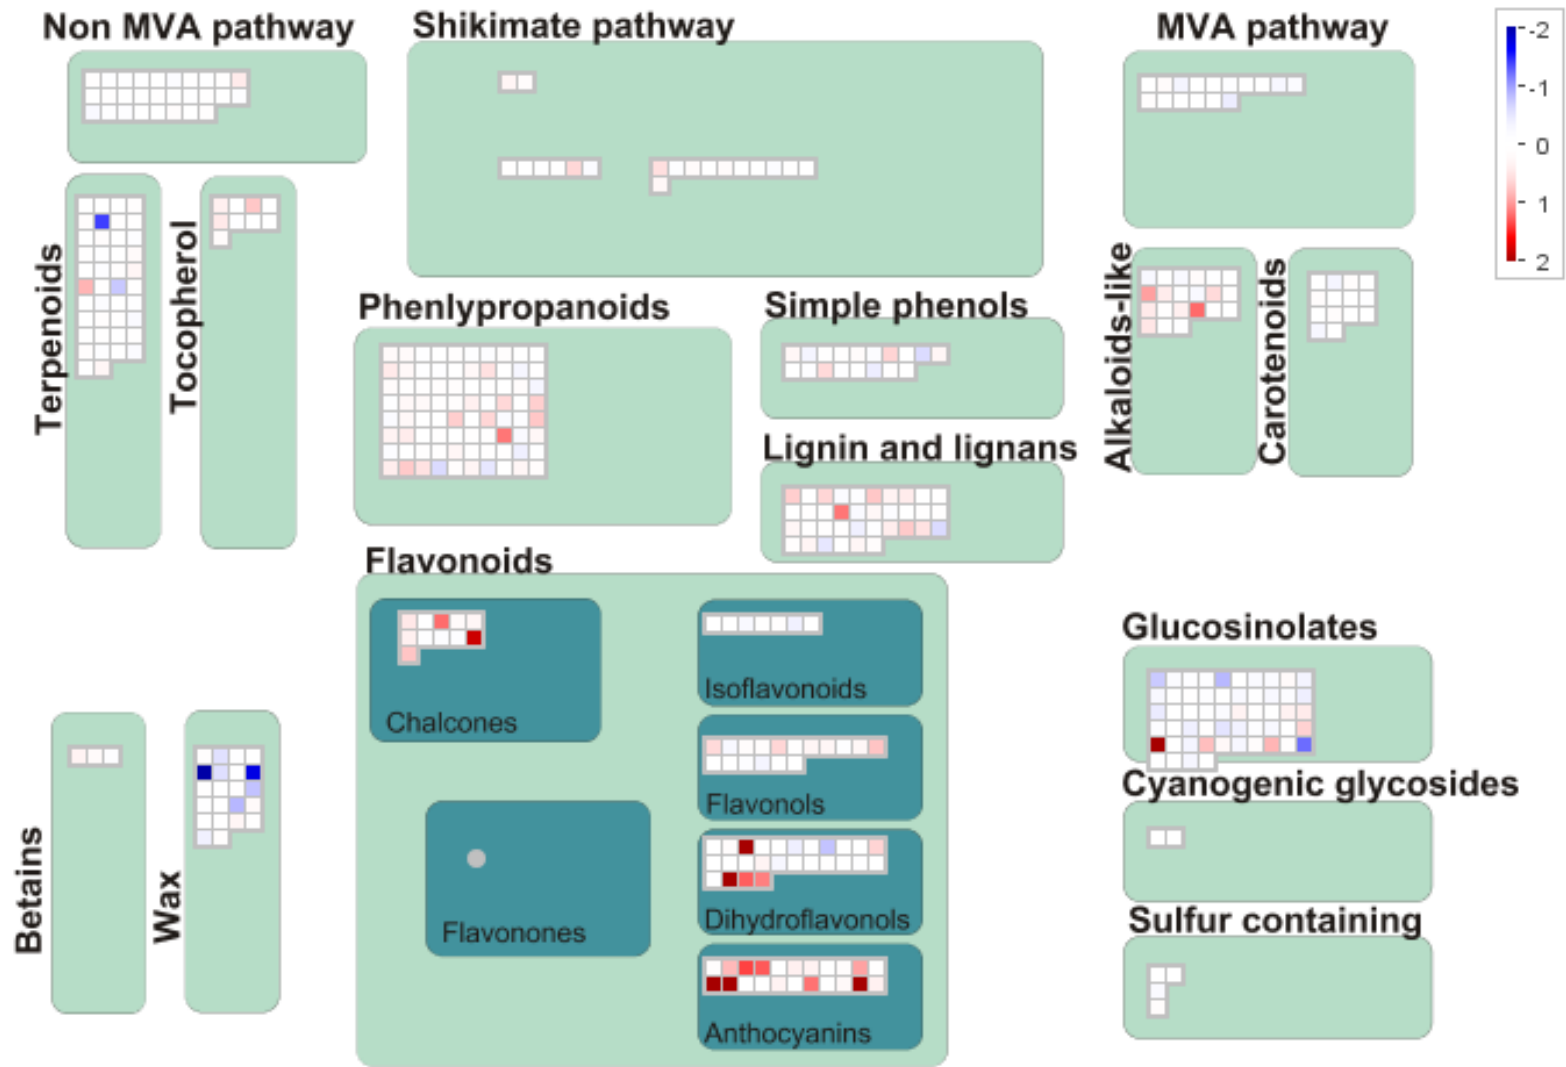

**Figure S2: MapMan representations of differentially expressed genes.**  
(D) GA versus control - Secondary metabolism.

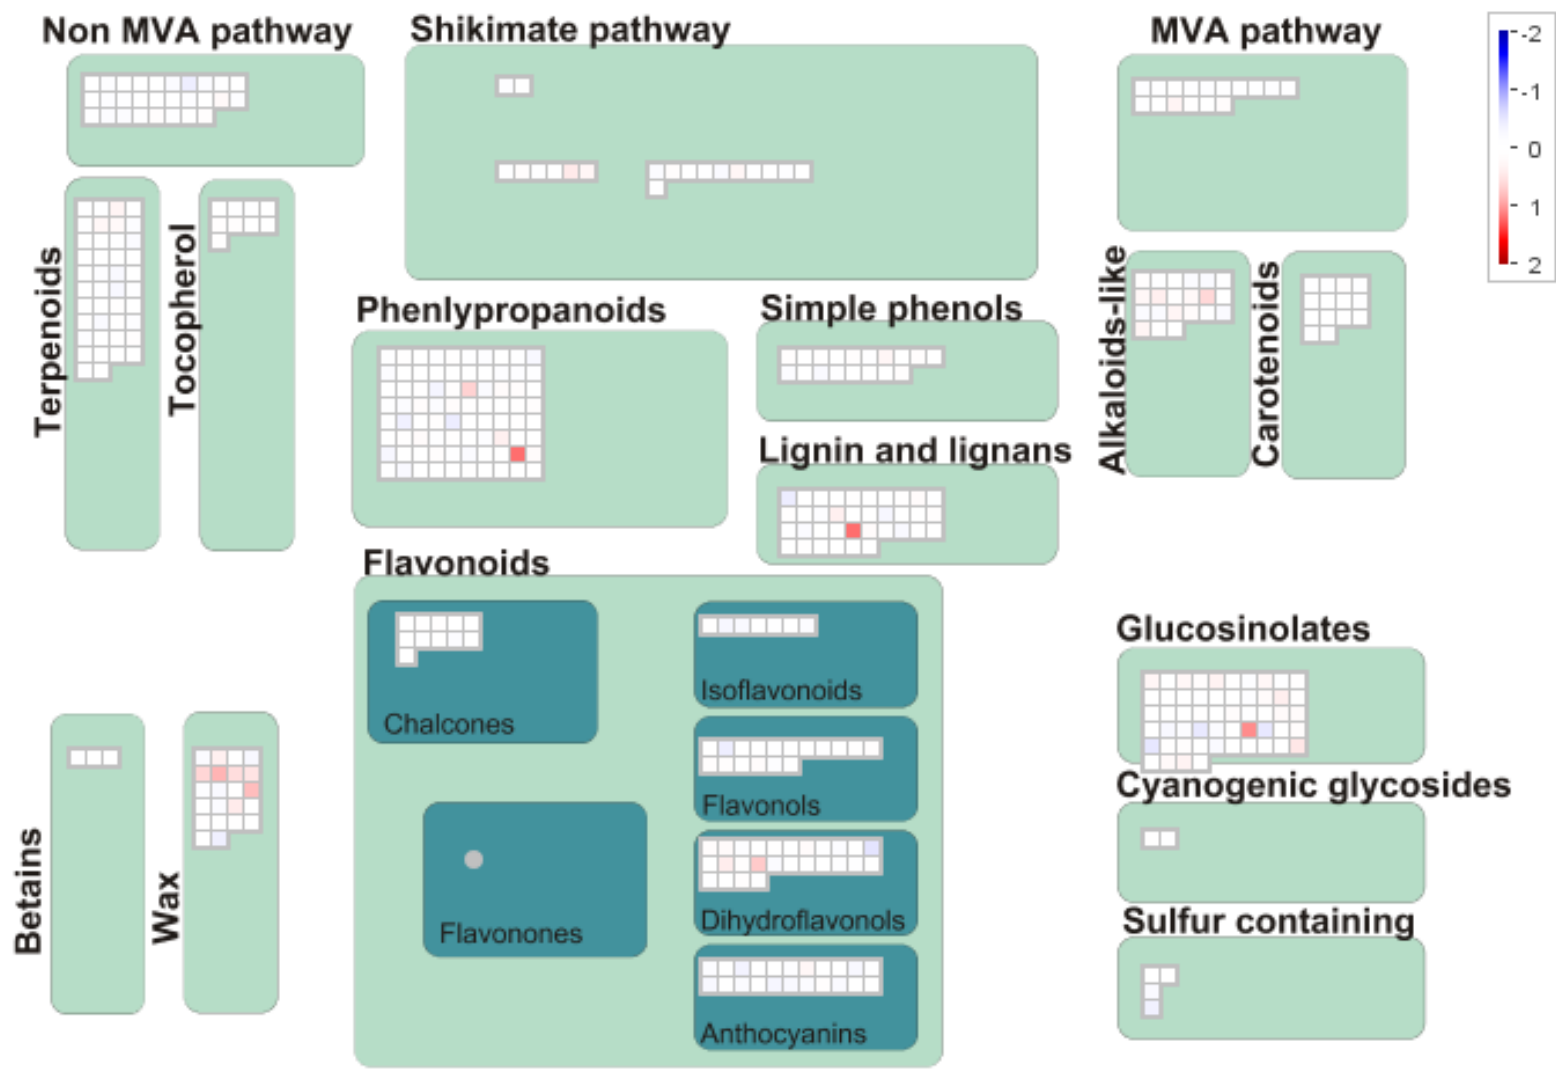

**Figure S2: MapMan representations of differentially expressed genes.**  
(E) PAC versus control - Cellular response.

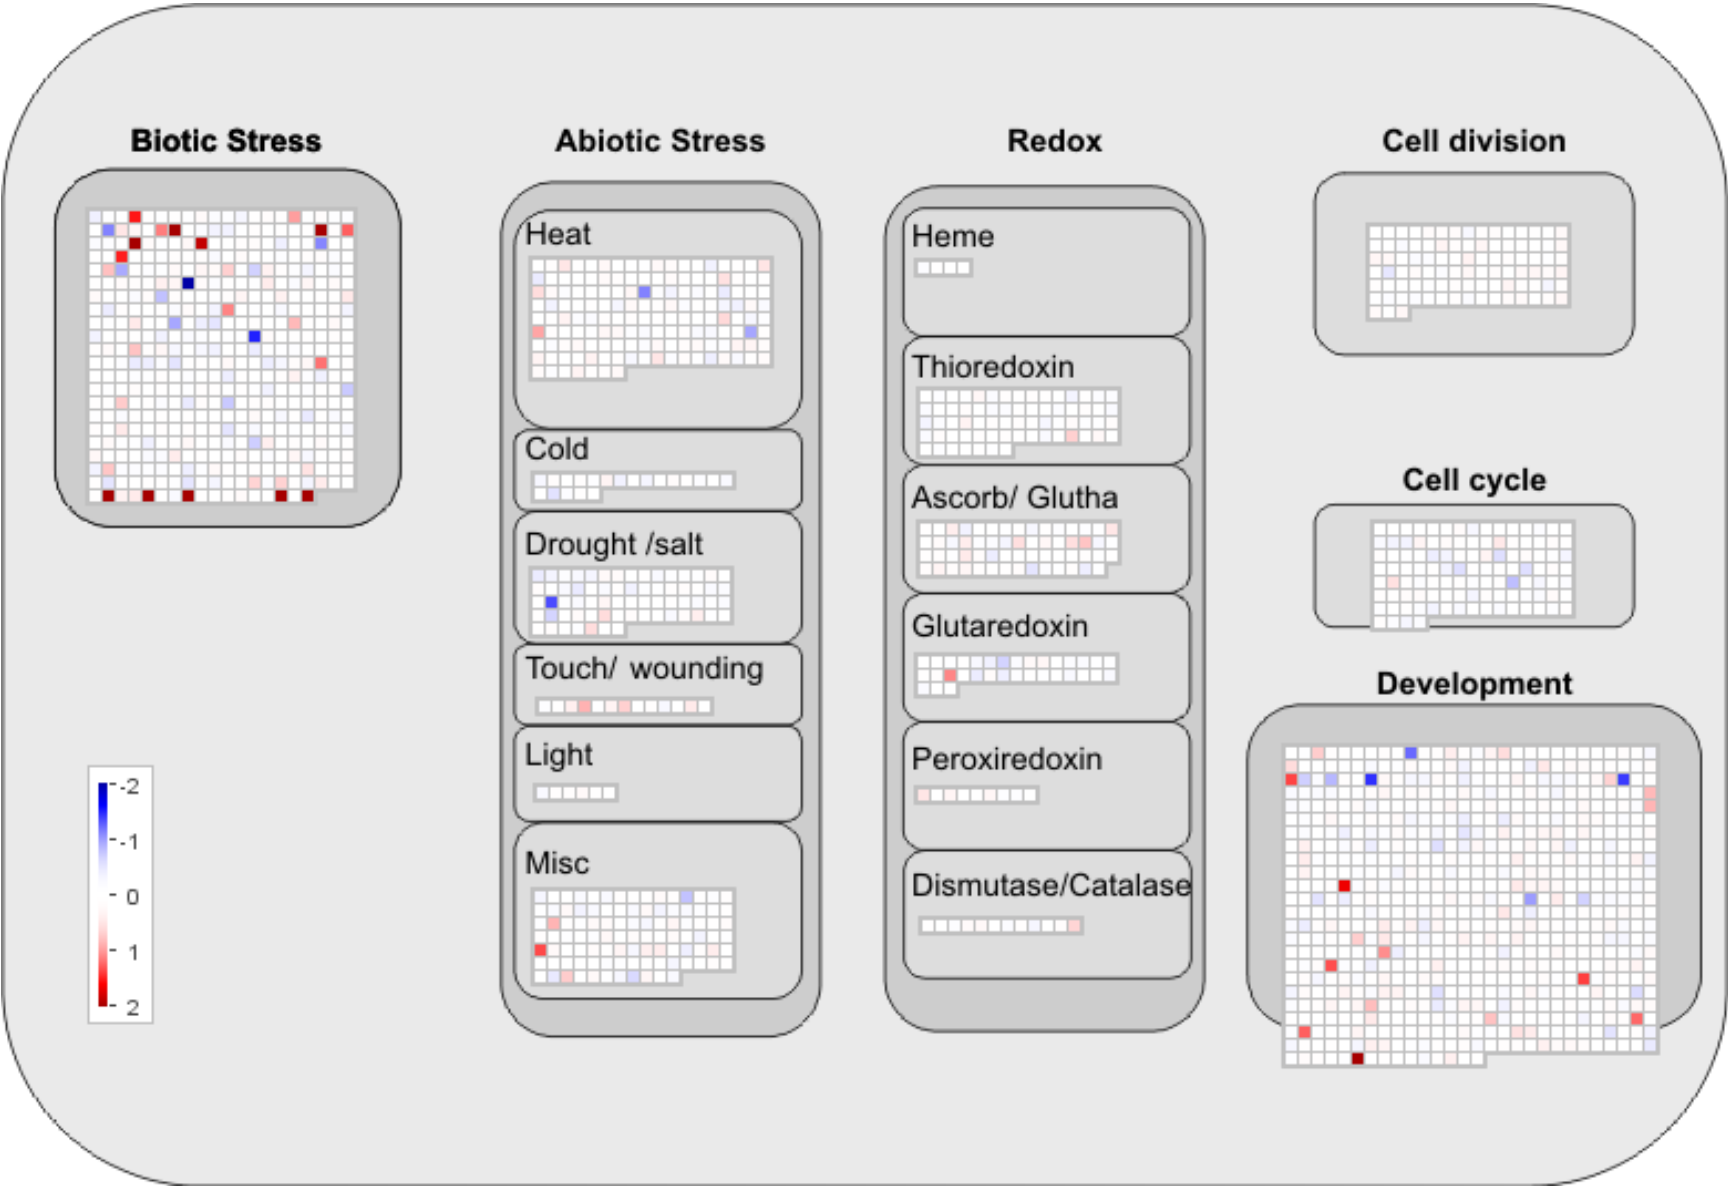

**Figure S2: MapMan representations of differentially expressed genes.**  
(F) GA versus control - Cellular response.

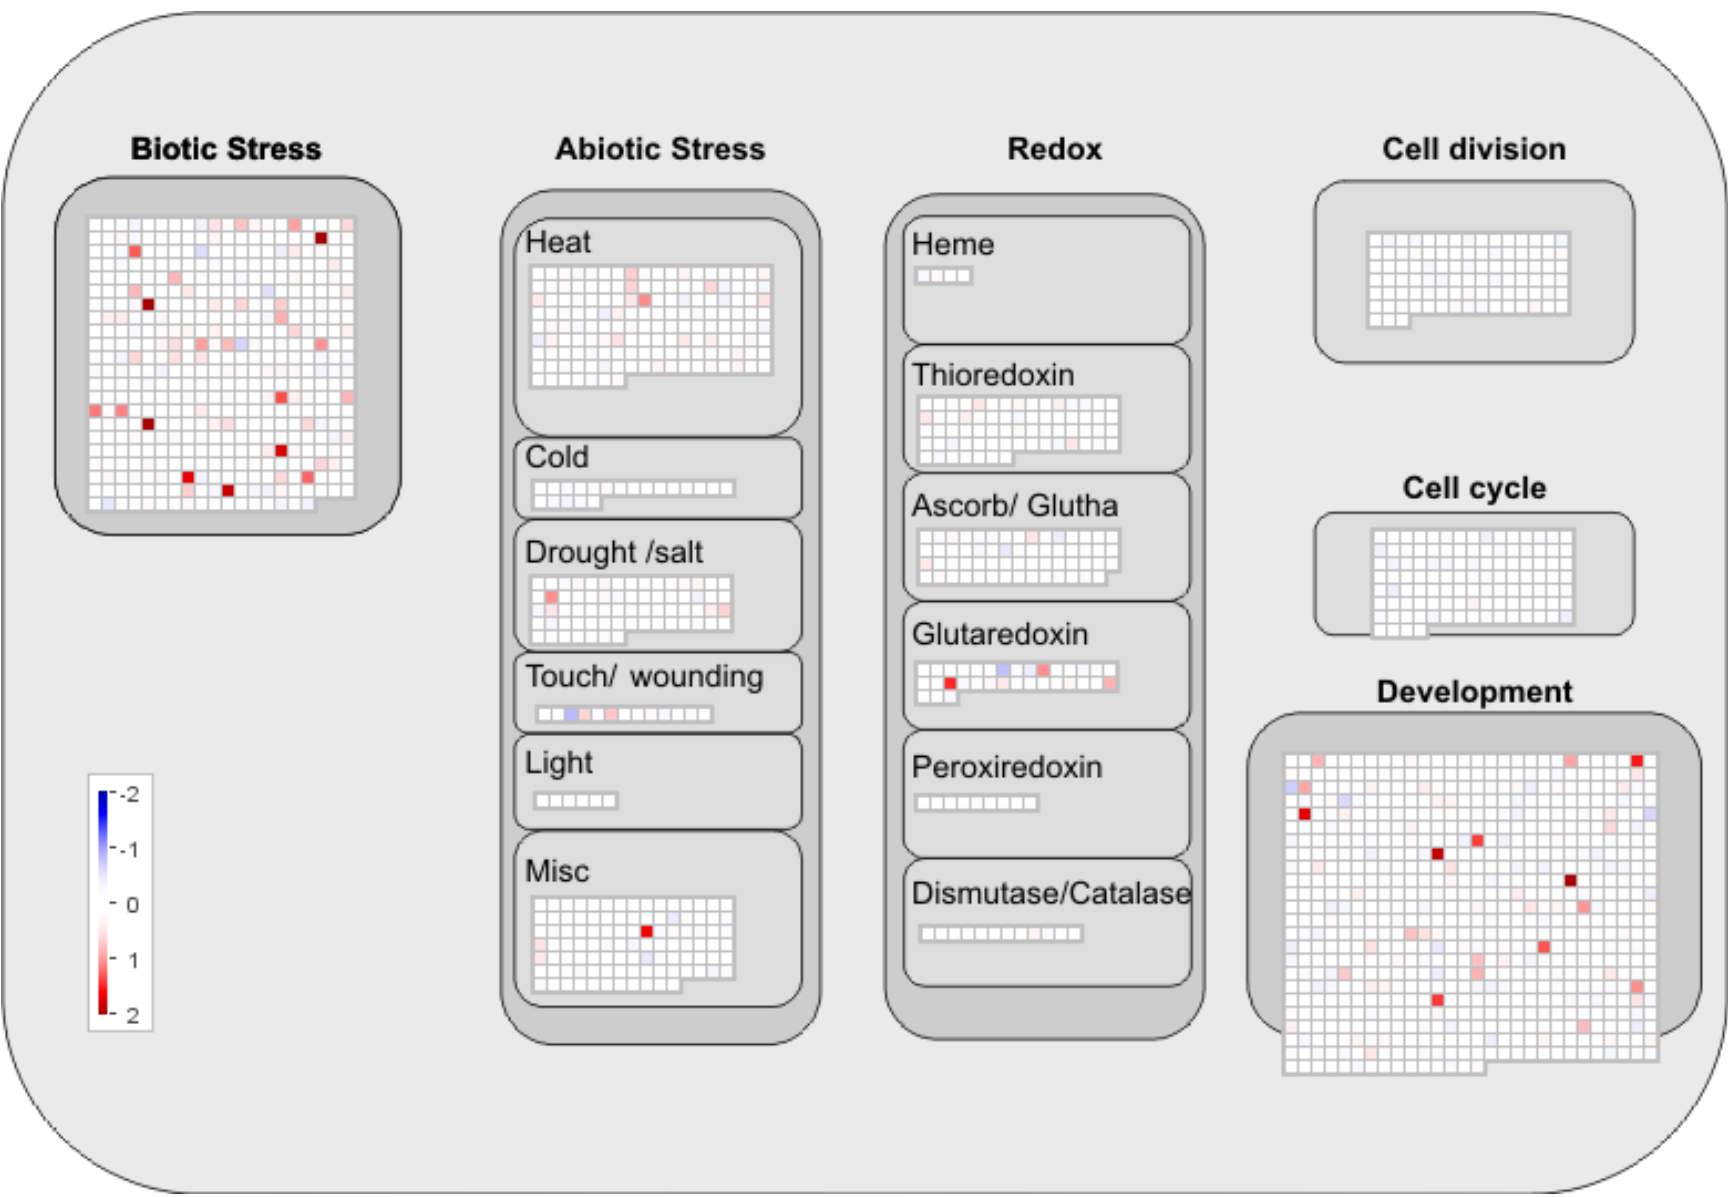

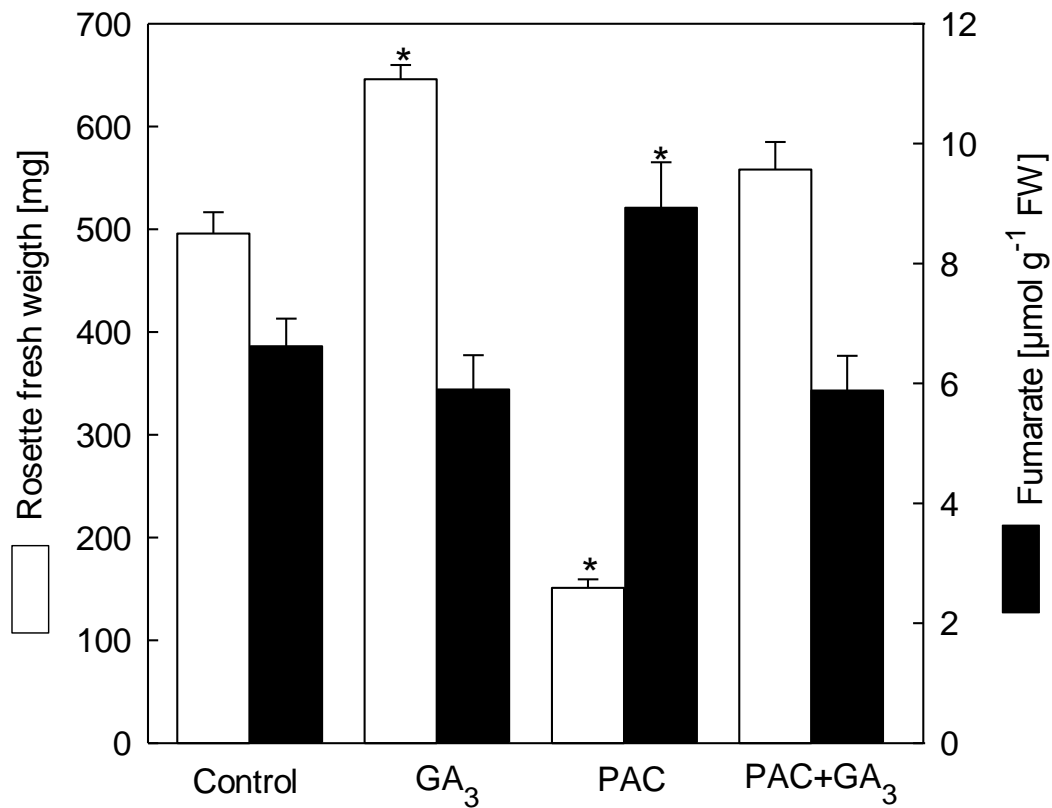

**Figure S3** Effect of treatment with PAC and/or  $\text{GA}_3$  on shoot biomass of *Arabidopsis* plants (27 days after sowing) and fumarate levels. Fourteen days after sowing, plants grown individually in pots were watered with 10 mL PAC (0.17 mM). To revert the growth inhibition, three days after PAC treatment plants were sprayed every second day with 1 mL of 50  $\mu\text{M}$   $\text{GA}_3$ . Asterisks indicate values determined by the Student's *t*-test to be significantly different from control ( $P < 0.05$ ). Data are means  $\pm$  SE of six replicates (each replicate is a pool of five plants).
